# Supplementary material
Source: PubMed Central journal article supplement (PMC2875377)
Supplement: NIHMS200189-supplement-01.pdf [file NIHMS200189-supplement-01.pdf]

**Supplementary Table S1. Laboratory isolates: Pfrh1 copy number and microsatellite data.** Supplementary Table S1. Laboratory isolates: Pfrh1 copy number and microsatellite data. Copy number (CN) lower and upper 95% confidence interval, and bp sizes of microsatellite sequences for all isolates are shown. Grey or blue shading indicates groups of parasites that share identity at the microsatellites typed. The single difference at locus C4M30 that distinguishes GCR3-C5 from other members of the FCR3 group most likely results from mutation. CN values are boxed for parasites carrying multiple copies of Pfrh1 and have been confirmed in independent real-time assays.

| MR4 #    | Parasite name                    | CN   | LR95% | UP95% | Ara2 | C4M30 | Polya1 | TA1 | C2M1 | C3M54 | TA60 |
|----------|----------------------------------|------|-------|-------|------|-------|--------|-----|------|-------|------|
| MRA-152G | 7G8                              | 0.61 | 0.34  | 1.11  | 63   | 171   | 184    | 172 | 203  | 266   | 72   |
| MRA-154G | 7G8                              | 0.88 | 0.80  | 0.96  | 63   | 171   | 184    | 172 | 203  | 266   | 72   |
| MRA-346G | Ghana III (Aotus)                | 0.73 | 0.62  | 0.86  | 66   | 169   | 150    | 169 | 184  | 215   | 90   |
| MRA-394  | 7C424                            | 1.02 | 0.92  | 1.14  | 66   | 169   | 196    | 140 | 194  | 240   | 81   |
| MRA-767G | HB-2                             | 1.23 | 1.14  | 1.33  | 66   | 171   | 181    | 190 | 194  | 240   | 72   |
| MRA-732G | FCR-8/West African               | 0.80 | 0.73  | 0.87  | 66   | 173   | 152    | 172 | 213  | 258   | 84   |
| MRA-733G | FCC-2/Hainan                     | 0.72 | 0.65  | 0.80  | 66   | 175   | 178    | 169 | 228  | 252   | 84   |
| MRA-309G | FCB                              | 5.48 | 4.74  | 6.32  | 66   | 177   | 152    | 163 | 196  | 258   | 84   |
| MRA-321G | FCR3CSA                          | 4.59 | 4.09  | 5.15  | 66   | 177   | 152    | 163 | 196  | 258   | 84   |
| MRA-737G | FCR-3/Gambia Clone 1             | 5.08 | 4.44  | 5.81  | 66   | 177   | 152    | 163 | 196  | 258   | 84   |
| MRA-738G | FCR-3/Gambia Clone D3            | 5.67 | 5.03  | 6.39  | 66   | 177   | 152    | 163 | 196  | 258   | 84   |
| MRA-739G | FCR-3/Gambia Clone D-4, Knobless | 7.28 | 6.30  | 8.40  | 66   | 177   | 152    | 163 | 196  | 258   | 84   |
| MRA-699G | FCR3-C5                          | 0.73 | 0.54  | 0.99  | 66   | 175   | 152    | 163 | 196  | 258   | 84   |
| MRA-153G | T9/94                            | 0.84 | 0.74  | 0.95  | 66   | 177   | 152    | 163 | 196  | 258   | 84   |
| MRA-326G | ITG-2G2                          | 0.91 | 0.66  | 1.25  | 66   | 177   | 152    | 163 | 196  | 258   | 84   |
| MRA-327G | ITG-2F6                          | 1.03 | 0.76  | 1.40  | 66   | 177   | 152    | 163 | 196  | 258   | 84   |
| MRA-731G | FCR3/Gambia                      | 0.94 | 0.81  | 1.10  | 66   | 177   | 152    | 163 | 196  | 258   | 84   |
| MRA-736G | FCR-3/FMG (Gambia)               | 0.97 | 0.73  | 1.28  | 66   | 177   | 152    | 163 | 196  | 258   | 84   |
| MRA-818G | T2/C6                            | 1.03 | 0.89  | 1.19  | 66   | 183   | 171    | 160 | 184  | 252   | 87   |
| MRA-149G | HB3-B2                           | 0.94 | 0.84  | 1.05  | 66   | 183   | 181    | 140 | 194  | 240   | 81   |
| MRA-155G | HB3                              | 0.84 | 0.74  | 0.95  | 66   | 183   | 181    | 140 | 194  | 240   | 81   |
| MRA-393  | QC01                             | 1.10 | 1.04  | 1.16  | 66   | 183   | 181    | 140 | 196  | 234   | 84   |
| MRA-331G | St Lucia                         | 0.83 | 0.69  | 1.00  | 66   | 185   | 181    | 140 | 184  | 250   | 81   |
| MRA-201G | D10                              | 0.82 | 0.71  | 0.96  | 66   | 193   | 152    | 172 | 215  | 244   | 90   |
| MRA-206G | TM91C235                         | 0.40 | 0.34  | 0.47  | 69   | 167   | 162    | 166 | 209  | 234   | 81   |
| MRA-200G | RO-33                            | 0.77 | 0.67  | 0.88  | 69   | 171   | 156    | 169 | 188  | 250   | 72   |
| MRA-821G | KMW11                            | 0.64 | 0.56  | 0.72  | 69   | 175   | 171    | 172 | 201  | 252   | 75   |
| MRA-159G | K1 Strain                        | 0.67 | 0.48  | 0.94  | 69   | 187   | 178    | 166 | 203  | 234   | 84   |
| MRA-202G | TM90C2A                          | 1.95 | 1.81  | 2.11  | 69   | 189   | 152    | 166 | 184  | 212   | 72   |
| MRA-151G | 3D7A                             | 0.80 | 0.59  | 1.09  | 69   | 197   | 152    | 184 | 217  | 238   | 84   |
| MRA-398  | D6                               | 0.78 | 0.68  | 0.90  | 72   | 169   | 168    | 169 | 186  | 234   | 72   |
| MRA-285G | D6                               | 0.89 | 0.77  | 1.02  | 72   | 169   | 168    | 169 | 186  | 234   | 72   |
| MRA-157G | W2                               | 1.84 | 1.61  | 2.11  | 72   | 169   | 196    | 166 | 196  | 234   | 84   |
| MRA-387  | Dd2                              | 0.68 | 0.57  | 0.80  | 72   | 169   | 196    | 166 | 196  | 234   | 84   |
| MRA-150G | Dd2                              | 0.89 | 0.80  | 1.00  | 72   | 169   | 196    | 166 | 196  | 234   | 84   |
| MRA-156G | Dd2                              | 0.67 | 0.50  | 0.89  | 72   | 169   | 196    | 166 | 196  | 234   | 84   |
| MRA-823G | LF4                              | 0.92 | 0.71  | 1.20  | 72   | 175   | 178    | 184 | 217  | 234   | 81   |
| MRA-205G | TM90C6B                          | 0.89 | 0.75  | 1.05  | 75   | 169   | 156    | 166 | 184  | 234   | 87   |
| MRA-176G | V1/S                             | 0.77 | 0.68  | 0.87  | 75   | 175   | 196    | 166 | 180  | 234   | 93   |
| MRA-820G | V1/S                             | 0.91 | 0.81  | 1.02  | 75   | 175   | 196    | 166 | 180  | 234   | 93   |
| MRA-284G | WR87                             | 0.72 | 0.66  | 0.79  | 75   | 187   | 171    | 157 | 221  | 238   | 81   |
| MRA-822G | MT/S1                            | 0.62 | 0.57  | 0.68  | 75   | 187   | 171    | 157 | 221  | 238   | 81   |
| MRA-819G | INDO                             | 7.93 | 6.74  | 9.34  | 75   | 193   | 152    | 157 | 203  | 195   | 81   |
| MRA-358G | Montagnard                       | 1.08 | 1.01  | 1.17  | 75   | nd    | 175    | 166 | 201  | nd    | 84   |
| MRA-204G | TM90C6A                          | 0.80 | 0.68  | 0.94  | 75   | 191   | 178    | 166 | 203  | 252   | 84   |
| MRA-207G | TM93C1088                        | 0.70 | 0.57  | 0.86  | 75   | 191   | 178    | 166 | 203  | 252   | 84   |
| MRA-328G | MalayanCamp K-                   | 0.99 | 0.84  | 1.15  | 81   | 199   | 196    | 175 | 228  | 226   | 81   |
| MRA-329G | MalayanCamp R-                   | 0.91 | 0.77  | 1.06  | 81   | 199   | 196    | 175 | 228  | 226   | 81   |
| MRA-330G | MalayanCamp R+                   | 0.92 | 0.87  | 0.98  | 81   | 199   | 196    | 175 | 228  | 226   | 81   |
